## RESEARCH ARTICLE

# MRI noise and auditory health: Can one hundred scans be linked to hearing loss? The case of the Courtois NeuroMod project

Eddy Fortier<sup>1,2\*</sup>, Pierre Bellec<sup>1,2</sup>, Julie A. Boyle<sup>2</sup>, Adrian Fuente<sup>2,3\*</sup>

**1** Département de Psychologie, Université de Montréal, Montréal, Québec, Canada, **2** Centre de Recherche de l'Institut Universitaire de Gériatrie de Montréal, Montréal, Québec, Canada, **3** École d'orthophonie et d'audiologie, Université de Montréal, Montréal, Québec, Canada

\* [eddy.fortier@umontreal.ca](mailto:eddy.fortier@umontreal.ca) (EF); [adrian.fuente@umontreal.ca](mailto:adrian.fuente@umontreal.ca) (AF)

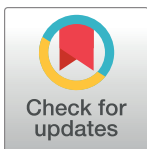

## OPEN ACCESS

**Citation:** Fortier E, Bellec P, Boyle JA, Fuente A (2025) MRI noise and auditory health: Can one hundred scans be linked to hearing loss? The case of the Courtois NeuroMod project. PLoS ONE 20(1): e0309513. <https://doi.org/10.1371/journal.pone.0309513>

**Editor:** Rafael da Costa Monsanto, Universidade Federal de Sao Paulo/Escola Paulista de Medicina (Unifesp/epm), BRAZIL

**Received:** May 1, 2023

**Accepted:** August 13, 2024

**Published:** January 17, 2025

**Copyright:** © 2025 Fortier et al. This is an open access article distributed under the terms of the [Creative Commons Attribution License](https://creativecommons.org/licenses/by/4.0/), which permits unrestricted use, distribution, and reproduction in any medium, provided the original author and source are credited.

**Data Availability Statement:** Data cannot be shared publicly because of privacy protection regulations put in place by the authors' institution. Data are available for researchers who meet the criteria for access to confidential data through a data transfer agreement available at the following URL: <https://www.cneuromod.ca/access/access/>. Three of the subjects have chosen to publicly release their data. It is available through the Canadian Open Neuroscience Platform (CONP) at:

## Abstract

Magnetic resonance imaging (MRI) is one of the most commonly used tools in neuroscience. However, it implies exposure to high noise levels. Exposure to noise can lead to temporary or permanent hearing loss, especially when the exposure is long and/or repeated. Little is known about the hearing risks for people undergoing several MRI examinations, especially in the context of longitudinal studies. The goal of this study was to assess the potential impact of repeated exposure to MRI noise on hearing in research participants undergoing dozens of MRI scans. This investigation was made possible thanks to an unprecedented intensive MRI research data collection effort (the Courtois NeuroMod project) where participants have been scanned weekly (up to twice a week), with the use of hearing protection, since 2018. Their hearing was tested periodically, over a period of 1.5 years. First, baseline pure-tone thresholds and distortion product otoacoustic emission (DPOAE) amplitudes were acquired before the beginning of this study. Hearing tests were then scheduled immediately before/immediately after a scan and with a delay of two to seven days after a scan. Pure-tone thresholds and DPOAE amplitudes showed no scanner noise impact right after the scan session when compared to the values acquired right before the scan session. Pure-tone thresholds and DPOAE amplitudes acquired in the delayed condition and compared to the baseline showed similar results. These results suggest an absence of impact from MRI noise exposure. Overall, our results show that an intensive longitudinal MRI study like the Courtois NeuroMod project likely does not cause hearing damage to participants when they properly utilize adequate hearing protection.

## Introduction

Modern research in human neuroscience and radiology relies heavily on magnetic resonance imaging (MRI). MRI is a versatile tool used for a variety of purposes by clinicians and researchers alike, including examination of post-stroke lesions [1, 2], reconstruction of white matter tracts [3–5] or observation of task-related brain activity through the hemodynamic

<https://portal.conp.ca/dataset?id=projects/cneuromod>.

**Funding:** PB is a senior fellow of "Fonds de Recherche en Santé - Québec" (<https://frq.gouv.qc.ca/>). A research grant was awarded to PB (principal investigator/scientific director) by the Courtois Foundation to conduct the Courtois NeuroMod project. JAB is the Courtois NeuroMod project manager. AF is a collaborating investigator in the Courtois NeuroMod project. EF is supported by a master's research bursary from Courtois NeuroMod project. The funders had no role in study design, data collection and analysis, decision to publish, or preparation of the manuscript.

**Competing interests:** The authors have declared that no competing interests exist.

response [6–8]. Since the introduction of MRI, more powerful scanners have periodically been introduced by manufacturers along with new acquisition sequences. Even though the scanner itself is very quiet, the activation of the acquisition sequence is an important source of high noise levels.

Each type of MRI acquisition having specific technical needs, multiple acquisition protocols have been developed, modified and optimized throughout the years. They all have specific parameters and electromagnetic properties. The choice of settings for some of those parameters has a major impact on the noise generated by this equipment [9–11], and thus, the level of risk to hearing varies from one sequence to another. For example, in their study on the effects of MRI noise exposure on the auditory system, Radomskij et al. [12] measured peak noise levels between 122 and 131 dB SPL for the sequences they used. Given these noise levels and how hazardous they can be to hearing, even if the exposure is short, England's health protection agency strongly recommends using MRI-compatible hearing protection devices [13].

Exposure to these high levels of noise is even more of a factor for studies that require participants to be scanned multiple times in a short period and/or scanned repeatedly for a long duration (i.e., years). Although these types of study, producing what is known as deep and dense datasets [14], have a high value to neuroscientists [15, 16] and aid our understanding of the human brain [17, 18], they may raise some concerns over these participants' hearing health. Jin et al. [19] showed that both prolonged exposure and elevated levels of noise in the MRI scanner can be linked to temporary hearing threshold shifts, even when wearing hearing protection devices. Similarly, Radomskij et al. [12] reported a significant effect of exposure to MRI noise on cochlear function, despite the use of earplugs. These findings are not surprising given that the recommended daily noise exposure dose can be reached in only a few minutes when exposed to MRI noise. According to the United States National Institute for Occupational Safety and Health (NIOSH) [20], the daily recommended noise exposure limit is 85 dBA as an 8-hour time-weighted average (TWA). Therefore, exposures to noise levels higher than 85 dBA imply shorter maximum daily doses. For example, the maximum daily dose for exposure to a 100-dBA noise is only 15 minutes [20]. On the other side of the Atlantic ocean, the European Agency for Safety and Health at Work's Directive 2003/10/EC requires that hearing protections are made available to workers when the 8-hour TWA noise exposure exceeds 80 dBA and renders their use mandatory when it exceeds 85 dBA [21].

Noise exposure can induce either temporary or permanent changes in hearing thresholds [22]. The recovery time from temporary threshold shifts (TTSs) is variable and depends on a number of factors directly associated with the noise exposure, such as the frequency spectrum of the noise, the temporal characteristics (continuous versus impulsive) and the duration of the exposure [23, 24]. In addition, the presence of an effective quiet period after the exposure, its quality (ambient noise level) and length influence the recovery time after a noise exposure [23]. TTSs indicate that the noise exposure was hazardous to hearing [25, 26]. Recurrent TTSs can lead to permanent threshold shifts, which may subsequently lead to hearing loss (i.e., hearing thresholds poorer than 20 dB HL [27, 28]). Conventional pure-tone audiometry (250 Hz–8 kHz) is currently used in hearing conservation programs to monitor hearing in noise-exposed workers [20]. However, extended high-frequency pure-tone audiometry (9–20 kHz) is recommended to detect early signs of noise-induced hearing loss (NIHL) [29]. In addition to pure-tone audiometry, otoacoustic emissions (OAEs) can be used with the aim to evaluate the function of outer hair cells in the cochlea. Outer hair cells are one of the main targets of noise exposure, and thus changes in OAEs can precede changes in conventional pure-tone thresholds [30, 31]. Therefore, OAEs have been suggested to be used for the early detection of noise-induced hearing loss and/or for monitoring hearing in people exposed to noise [32, 33].

Little is known about the impact of cumulative MRI noise exposure on individuals who are periodically scanned and who utilize hearing protection while being tested. This issue is important for deep and dense dataset projects in general, and is particularly relevant for the participants of the Courtois NeuroMod project, an MRI research data collection effort of unprecedented scale that spanned 5 years and involved weekly MRI scans [34]. Thus, the goal of this study was to evaluate possible impact on hearing induced by repeated MRI scanning on the Courtois NeuroMod participants ( $n = 6$ ). If present, such an impact would indicate hazardous noise exposure levels, even with the use of hearing protection. If absent, this work would document cases where MRI noise did not impact participants' hearing with the largest amount of exposure to date, even though these observations may not generalize outside of the Courtois NeuroMod experimental setup. We designed a hearing test protocol to capture both clinical and subclinical changes over time. Specifically, the Courtois NeuroMod research participants were tested for temporary and permanent changes in hearing outcomes with clinical (pure-tone audiometry: 250 Hz– 8 kHz) and subclinical (pure-tone audiometry: 9 kHz– 20 kHz and distortion product OAEs (DPOAEs)) auditory tests. To detect possible temporary changes in hearing outcomes, participants were evaluated immediately before and immediately after the scanning sessions. For permanent changes in hearing outcomes, participants were evaluated between 48 hours and seven days after a scanning session. In this case, hearing outcomes (i.e., pure-tone thresholds and DPOAE amplitudes) were compared with the baseline values that were obtained before we started the hearing health monitoring project.

## Methods

### The Courtois NeuroMod project

This research project is part of a larger initiative called the Courtois NeuroMod project—CNeuroMod [34]. The CNeuroMod project is an intensive MRI scanning platform designed to acquire massive amounts of brain imaging data on a limited number of participants performing a wide range of tasks. Participants take part in scanning sessions lasting between 1.5 and 3 hours per week over a period of six years. This period started between the fall of 2018 and summer of 2019 (variable for each participant). Such an intensive scanning schedule raises health and safety concerns, including the hearing health of the participants [19]. Thus, a sub-component of the Courtois NeuroMod project was to monitor the participants' hearing health for the duration of the study.

### Participants

The participant group included three self-reported women and three self-reported men who all indicated being right-handed at the beginning of the CNeuroMod project. Their age ranged from 33 to 49 years (mean = 42.58 years, SD = 6.14 years) when we acquired the baseline values for the hearing tests used in the monitoring protocol. Their age ranged from 33 to 50 years (mean = 43.38, SD = 6.43 years) at the time of their last test session. The time interval between the baseline session and the last test session varied between 1.15 and 16.11 months (mean = 9.55 months, SD = 5.66 months). All participants gave their written consent to participate in the CNeuroMod project, which was approved by the local ethics committee (project CER VN 18-19-22 of the ageing and neuroimaging research ethics committee at the Centre de recherche de l'Institut universitaire de gériatrie de Montréal (CRIUGM)). The exclusion criteria included visual and hearing impairments that would prevent participants from being able to see and hear the presented stimuli and the standard MRI and magnetoencephalography exclusion criteria (presence of magnetic metal pieces in the body: pacemaker, aneurysm clips, metallic stents, shrapnel/bullet fragments, certain orthopedic implants, etc.). Since this study is

done as part of a larger research project, the sole inclusion criterion for the present study was to be enrolled in the CNeuroMod research project. One participant (sub-04) temporarily suspended scanning during the course of the hearing test protocol. Therefore, we stopped monitoring their hearing, and thus their dataset is smaller than that of the other participants. Another participant (sub-05) had a pre-existing hearing impairment and no OAE response in the left ear (see [S1 Fig](#)). To make sure that the scanning sessions were not causing further impairment, we subjected this participant to an intensive five-week pure-tone audiometry protocol where they were tested before and after each scan session, making their dataset larger than that of the other participants. Lastly, participant schedules and availability were important variables in our study, resulting in not all subjects having the same number of hearing test sessions, and thus, not all subjects have an equal number of sessions for each test condition.

## Protocol design

To accomplish the aim of the study, three experimental conditions were designed ([Table 1](#)): two conditions to detect possible temporary changes in hearing outcomes (pre-scan and post-scan: short-term observations), and one condition to detect possible permanent changes in hearing outcomes (delayed post-scan session: long-term observation). Therefore, each observation comprises two test sessions, each one of them being identified by an identifier formed by the abbreviation “ses-” and a two-digit number (e.g., ses-05). The goal of the short-term observations was to see if the noise exposure associated with a given scanning session had an adverse effect on the auditory system. It is important to note that such changes may be temporary or permanent. However, obtaining hearing outcomes immediately before and after the noise exposure makes it possible to determine if that particular noise exposure was harmful to the auditory system. The goal of the delayed observation was to see if the cumulative scanning sessions had an enduring impact on hearing. This was done by comparing hearing test results obtained in a test session carried out between 48 hours and 7 days after a scanning session and those obtained at baseline (beginning of this research project: January–February 2021). In addition, this condition was used to determine whether any changes in hearing outcomes observed in the previous conditions (immediately before/immediately after the scanning session) remained. If that was the case, then such changes were considered permanent rather than temporary.

Tymp: Tympanometry. Reflex: Stapedial reflex. PTA: Pure-tone audiometry. DPOAE: Distortion product otoacoustic emissions.

## Hearing tests

**Outer and middle ear.** Prior to each test session, we conducted a routine check to ensure the absence of external and middle-ear problems. First, a visual otoscopic examination was performed using a Medical Pro otoscope to ensure the absence of obstructing debris in the external auditory canal and the integrity of the tympanic membrane. Then, to assess the mobility of the tympanic-membrane-ossicles system, tympanograms were obtained using an 85 dB SPL probe tone at a frequency of 226 Hz (MADSEN Zodiac Type 1096 SA, GN Otometrics A/S, now Natus Medical Inc.). In addition, ipsilateral stapedial reflexes at 0.5 kHz, 1 kHz, 2 kHz, 4 kHz and with broadband noise (400–4000 Hz) were acquired.

**Pure-tone audiometry.** Air conduction pure-tone thresholds were obtained using the Otometrics OTOSuite software (version 4.84.0.61) and a MADSEN Astera2 Type 1066 clinical audiometer (GN Otometrics A/S, now Natus Medical Inc.). Both the standard frequency range (0.25, 0.5, 1, 2, 3, 4, 6 and 8 kHz) and the extended high frequency range (9, 10, 11.2, 12.5, 14, 16, 18 and 20 kHz) were tested using 5-dB-HL steps. Pure-tone stimuli were first presented to

Table 1. Hearing test distribution in three experimental conditions.

| Condition type | Condition number |           | Otoscopy | Tymp | Reflex | PTA | DPOAE |
|----------------|------------------|-----------|----------|------|--------|-----|-------|
| Baseline       |                  |           | X        | X    | X      | X   | X     |
| Short-term     | 1                | Pre-scan  | X        | X    | X      | X   |       |
|                |                  | Post-scan |          |      |        | X   |       |
|                | 2                | Pre-scan  | X        | X    | X      |     | X     |
|                |                  | Post-scan |          |      |        |     | X     |
| Long-term      | 3                | Delayed   | X        | X    | X      | X   |       |

<https://doi.org/10.1371/journal.pone.0309513.t001>

the participants using Otometrics insert earphones with 3M E-A-RLink type 3A foam ear tips for the standard frequency range and then using Sennheiser HDA 300 headphones for the extended high frequency range. Participants were instructed to press a single-button response box as soon as they thought they heard a sound. First, the right-ear thresholds were obtained, then the left-ear thresholds. The same person (a trained clinical audiologist) tested all participants across the sessions using a modified Hughson and Westlake [35] procedure as described by Carhart and Jerger [36]. Calibration of the stimuli presentation equipment according to ANSI/ASA S3.6–2010 [37] was done before the beginning of the project.

Single-frequency measured differences were divided into three categories using a strict threshold generalized to all tested frequencies [38] and a more widely accepted threshold [39]. This decision was based on the following reasons: 1) we had an insufficient amount of repetitions of each test condition to properly apply statistical analyses and corrections for multiple comparisons, 2) the lack of consensus in the field regarding how to assess the significance of test-retest differences in pure-tone audiometry [20, 39–46], and 3) the variable per-frequency significant threshold shift values found in the literature [38, 47, 48]. Therefore, threshold shifts were considered negligible and non-significant if they were showing improvements or deteriorations no greater than 5 dB HL ( $threshold\ shift \in [-\infty, 5]$ ) [38]. Threshold shifts were considered significant but mild if they were greater than 5 dB HL but smaller than 20 dB HL ( $threshold\ shift \in [5, 20]$ ). Threshold shifts were considered significant and severe if they showed deteriorations of 20 dB HL or more ( $threshold\ shift \in [20, \infty]$ ) [39]. S1 Table displays a brief comparison of the different pure-tone significant-threshold-shift criteria mentioned here. Note that none of the subjects presented with a measurable hearing threshold at 18 and 20 kHz in all testing sessions.

**Otoacoustic emissions.** The function of the outer hair cells of the cochlea was evaluated through the use of DPOAEs. DPOAE amplitudes were obtained by the simultaneous presentation of two primary frequencies using a repeating downward presentation cycle. An F2/F1 ratio of 1.22 and presentation levels L1/L2 of 65/55 dB SPL were used. The F2 frequencies included 1, 1.5, 2, 3, 4, 6, 8 and 10 kHz. DPOAE tests were administered using the ILOv6 software (version 6.41.27.33), an Echoport ILO292 USB-II stimuli presentation device (version 2.001J) and a UGD probe (Otodynamics Ltd.). The measured DPOAE amplitudes (in dB SPL) had to exceed the noise floor by more than two standard deviations to be considered present. Therefore, values are missing in the OAE figures for some participants due to DPOAE responses that did not exceed this threshold during pre-scan, post-scan, baseline and/or delayed test session(s). These missing values are all located in the extreme parts of the tested spectrum (for F2 = 1 kHz and 1.5 kHz or for F2 = 8 kHz and 10 kHz). To evaluate the significance of DPOAE test-retest differences, the Keppler et al. [49] minimal detectable difference (95%) criteria for a 60-minute delay (short-term observation; 1 kHz: 3.78 dB, 1.4 kHz: 2.90 dB, 2 kHz: 2.06 dB, 2.8 kHz: 2.09 dB, 4 kHz: 1.83 dB, 6 kHz: 1.58 dB, 8 kHz: 2.80 dB) and a 7-day delay (long-term observation; 1 kHz: 4.05 dB, 1.4 kHz: 3.52 dB, 2 kHz: 2.69 dB, 2.8 kHz: 1.97

dB, 4 kHz: 2.55 dB, 6 kHz: 2.53 dB, 8 kHz: 4.43 dB) were used because they were the closest to our time intervals between two tests. Approximations had to be made since the criteria had values for 1.0, 1.4, 2.0, 2.8, 4.0, 6.0 and 8.0 kHz. Therefore, we used the threshold value established at 1.4 kHz for 1.5 kHz, the value at 2.8 kHz for 3.0 kHz and the value at 8 kHz for 8 and 10 kHz. Calibration of the stimuli presentation equipment was done before the beginning of the project.

Pure-tone audiometry and DPOAE tests were administered to the participants while they were seated on a chair inside a GENIE Series model GN-17 soundproof booth (GN Otometrics A/S, now Natus Medical Inc.).

**Detection of clinical and subclinical changes.** A clinical impact was considered present when a standard pure-tone (250 Hz– 8 kHz) threshold shift would reach the mild threshold shift range (see Pure-tone audiometry section). A subclinical impact was considered present when the global portrait given by the DPOAE amplitudes and extended high frequency pure-tone thresholds showed significant shifts (DPOAE: amplitude decrease, see Otoacoustic emissions section; extended pure-tone threshold: mild threshold increase, see Pure-tone audiometry section) for both these tests. It was also expected that these changes would be consistent (through ears, sessions and participants) [31] and would start from the highest end of the hearing spectrum, potentially progressing toward the lower frequencies as subclinical changes evolve into clinical changes [29, 50].

## Experimental conditions

Hearing sessions in the short-term observations were added on top of the scanning session and were quite demanding for participants. To lighten the test load for the participants, this condition was split into two sessions based on the tests used: PTA and DPOAE (see Table 1, conditions #1 and #2). The test condition carried out between 48 hours and 7 days after a scanning session included all tests (see Table 1, condition #3).

## MRI acquisition

Hearing outcomes associated with noise exposures from two types of MRI acquisition sessions (i.e., anatomical and functional) were investigated in this study. This is required because the different MRI acquisition sequences used in the anatomical and functional sessions could also be linked with different noise exposures in terms of amplitude and spectrum. The MRI scanner used is a 3 T Siemens Prisma Fit scanner located at Unité de Neuroimagerie Fonctionnelle (CRIUGM, Montréal, Canada). This scanner is equipped with a 2-channel transmit body coil and the data acquisition is done using a 64-channel receive head/neck coil antenna. Detailed information on scanning sequences and parameters is available at this address: <https://docs.cneuromod.ca/en/latest/MRI.html>. Total scanning time for each of the anatomical sessions is approximately 1 hour and 5 minutes and scanning time for each of the functional sessions is between 45 minutes and 2 hours and 30 minutes.

**MRI sequences' noise levels.** The different MRI acquisition sequences used during the scanning sessions can be linked to different noise exposures. For safety reasons linked to the magnetic properties of the MRI scanner, noise levels associated with each of the scanner sequences were acquired with a sound level meter (Piccolo sound level meter model SLM-P1, Soft dB; sampling frequency: 1 Hz) on a tripod stand placed just outside of the MRI scanner room. The distance between the entrance of the scanner's bore and the sound level meter was 5.2 meters (~17 feet) at an angle of approximately 40–45 degrees to the bore axis. It is important to note here that the actual noise levels experienced by research participants are considerably higher than what we measured due to their closer proximity to the noise source and the

narrowness of the bore (60 centimeters). Table 2 presents the sound levels associated with each of the MRI sequences used by the CNeuroMod project. Noise levels were measured for the shortest of two durations: approximately one minute, or the whole sequence's duration (for sequences that are activated for less than one minute: localizer sequences (19 seconds), scout sequence (14 seconds), and AP phase encoding sequence (15 seconds)).

**Hearing protection.** The use of hearing protection in the MRI scanner is strongly recommended, especially when auditory stimuli are involved in the scanning session [52]. The hearing protection used by the participants during the scanning sessions was a combination of devices that evolved since the beginning of the CNeuroMod project. The purpose of these iterations was to constantly try to provide the best level of protection possible for the participants' hearing while allowing the presentation of audio stimuli. At the beginning of the project, they consisted of a combination of in-house modified commercial earmuffs (Leightning L2F Premium Folding Earmuff, Stanley Black & Decker Inc.; Pre-modification advertised Noise Reduction Rating: 27 dB), and an S15 MRI-compatible earphone system (Sensimetrics Corporation) coupled with standard-size, original-style Comply disposable canal tips (Hearing Components, Inc.; Advertised Noise Reduction Rating: 29 dB). The S15 is a commonly used earphone system [53] used to present high-quality auditory stimuli to research participants. Modification of the commercial earmuffs was necessary to allow them to fit inside the head

**Table 2. Sound levels associated with the MRI acquisition sequences used by the Courtois NeuroMod project.**

| Sequences                                                                                                   | Sound levels (dBA) |      |      |      |
|-------------------------------------------------------------------------------------------------------------|--------------------|------|------|------|
|                                                                                                             | Mean               | SD   | Min  | Max  |
| <b>Common sequence</b>                                                                                      |                    |      |      |      |
| localizer (brain) sequence                                                                                  | 73.08              | 2.06 | 70.5 | 77.2 |
| <b>Anatomical sessions' sequences</b>                                                                       |                    |      |      |      |
| <i>Brain sequences</i>                                                                                      |                    |      |      |      |
| T1-weighted MPRAGE 3D sagittal sequence                                                                     | 71.88              | 0.70 | 70.5 | 73.6 |
| T2-weighted FSE (SPACE) 3D sagittal sequence                                                                | 71.38              | 8.65 | 59.8 | 81.8 |
| diffusion-weighted 2D axial sequence                                                                        | 80.91              | 0.53 | 79.9 | 81.6 |
| gradient-echo magnetization-transfer 3D sequence                                                            | 69.00              | 0.52 | 67.9 | 70.1 |
| gradient-echo proton density 3D sequence                                                                    | 69.12              | 0.78 | 67.6 | 70.5 |
| gradient-echo T1-weighted 3D sequence                                                                       | 70.83              | 0.69 | 69.4 | 72.2 |
| MP2RAGE 3D sequence                                                                                         | 66.69              | 6.55 | 59.6 | 73.7 |
| susceptibility-weighted 3D sequence                                                                         | 71.89              | 0.37 | 71.1 | 72.7 |
| <i>Spinal cord sequences</i>                                                                                |                    |      |      |      |
| localizer (spinal cord) sequence                                                                            | 70.61              | 1.19 | 68.3 | 73.2 |
| T2-weighted 3D sagittal sequence                                                                            | 72.47              | 6.26 | 62.8 | 78.7 |
| diffusion-weighted 2D axial sequence                                                                        | 74.33              | 1.38 | 72.0 | 76.6 |
| gradient-echo magnetization-transfer 3D axial sequence                                                      | 71.71              | 0.67 | 70.9 | 73.1 |
| gradient-echo T1-weighted 3D axial sequence                                                                 | 73.69              | 0.73 | 72.8 | 75.3 |
| gradient-echo ME                                                                                            | 71.76              | 1.28 | 69.0 | 74.0 |
| <b>Functional sessions' sequences</b>                                                                       |                    |      |      |      |
| Scout sequence                                                                                              | 75.16              | 1.29 | 71.8 | 76.8 |
| AP phase encoding sequence                                                                                  | 80.57              | 0.26 | 79.7 | 80.7 |
| accelerated simultaneous multi-slice, gradient echo-planar imaging sequence [51]                            | 81.35              | 0.43 | 80.2 | 82.0 |
| accelerated simultaneous multi-slice, gradient echo-planar imaging sequence [51]: Emotions' dataset variant | 80.09              | 0.19 | 79.6 | 80.3 |

SD: Standard deviation. Min: Minimum. Max: Maximum.

<https://doi.org/10.1371/journal.pone.0309513.t002>

coil antenna. Unfortunately, these modifications likely negatively influenced their effectiveness, and more importantly, generated pressure points that caused major discomfort for some of the participants. Moreover, the chosen length and size of the canal tips were not optimal for everyone's auditory canal, leading to potential variability in the quality of the fit and level of protection. These problems were iteratively addressed over the course of the study, and the last evolution of the device combination includes participant-specific-size Comply disposable canal tips, as well as headphone replacement memory foam rings (Brainwavz Audio).

## Results

### Short-term observations

The goal of the short-term observation was to monitor potential temporary effects of scanner noise on the participants' hearing. To do so, hearing tests supplying clinical (standard pure-tone audiometry) and subclinical (extended high frequency pure-tone audiometry and DPOAE) information on the participants' hearing health were performed immediately before and after a scanning session. Three participants were tested before/after an anatomical scanning session (pure-tone: sub-01, 02 and 05; DPOAE: sub-02, 03 and 06). Five participants' pure-tone thresholds were tested once or twice before/after a functional scanning session (sub-01, 02, 03, 04 and 06). Sub-05 pure-tone thresholds were tested more extensively (see Participants section). Five participants' DPOAE amplitudes were tested once or twice before/after a functional scanning session (sub-01, 02, 03, 05 and 06). Figs 1 and 2 display the results for the two outcomes: pure-tone thresholds (Fig 1) and DPOAE amplitudes (Fig 2).

**Clinical outcome shows no short-term impact of MRI noise exposure.** Hearing thresholds acquired right after a scan session were compared to hearing thresholds acquired right before that same scan session (post-scan value–pre-scan value). In Fig 1, a mild increase in hearing thresholds is highlighted with an orange background, while a severe increase of hearing thresholds is highlighted with a red background (see Methods, Pure-tone audiometry section). Using this significance criteria, standard frequencies (250 Hz– 8 kHz) showed no significant threshold increase (difference greater than 5 dB HL) for both anatomical and functional acquisition sequences.

**Subclinical outcomes were variable, and were not indicative of short-term impact of MRI noise exposure.** DPOAE amplitudes (in dB SPL) measured right after a scan session were compared to the amplitudes measured right before that same scan session (post-scan value–pre-scan value). In Fig 2, a significant DPOAE amplitude decrease (see Methods, Otoacoustic emissions section) is highlighted with a red background. For the anatomical scans (Fig 2, panel b), some changes were observed, but were inconsistent across subjects. For example, sub-03 and sub-06 exhibited significant DPOAE amplitude reductions in both ears while sub-02 did not show amplitude reduction. Changes were also inconsistent in terms of the F2 involved. For example, changes were detected for different high F2 frequencies for the two ears of sub-03. Amplitude reductions in sub-06 were detected at low F2 frequencies. These observations were thus not indicative of subclinical hearing damages, but rather of test-retest variability.

Regarding the results after functional scan sessions (Fig 2, panel c), changes were also observed inconsistently across subjects and frequencies. Specifically, sub-01 showed significant DPOAE amplitude reductions while amplitude reductions were minimal or non-existent for sub-02, sub-03, sub-05 and sub-06. Changes observed in sub-01 were mainly in the right ear and more pronounced for F2s in the low frequency spectrum. On the other hand, some DPOAE amplitudes in some subjects actually improved (i.e., higher amplitudes) after a functional scan session. These results were thus again not suggestive of subclinical injury.



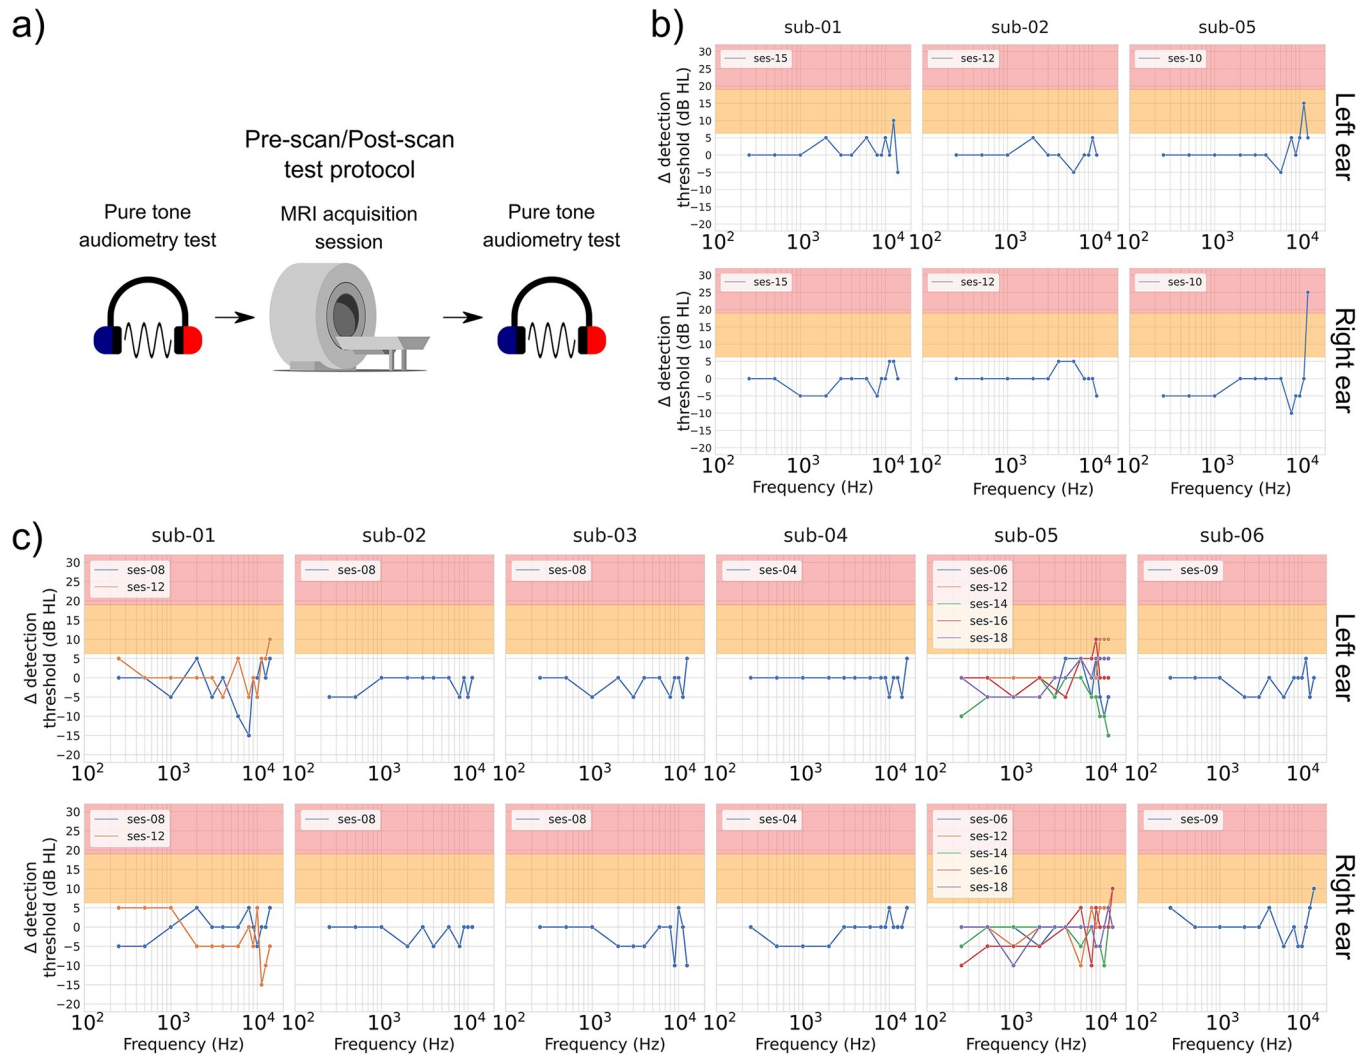

**Fig 1. Pure-tone audiometric threshold differences (in dB HL), post-scan minus pre-scan, as a function of the pure-tone frequency.** a) presents a schematic description of the test session progress. Results are presented for b) anatomical scans and c) functional scans, as these sequences do not generate similar noises in terms of both amplitude and frequency spectrum. Pure-tone threshold results are presented for both standard (0.25, 0.5, 1, 2, 3, 4, 6 and 8 kHz) and extended high frequency (9, 10, 11.2, 12.5, 14, 16, 18, and 20 kHz) ranges. For each participant, graphs on the top row are for the left ear, while graphs on the bottom row are for the right ear. Worsening hearing thresholds of a mild degree (> 5 but < 20 dB HL) are highlighted with an orange background, while severe increases (≥ 20 dB HL) are highlighted with a red background. When multiple observations have been conducted per participant, each line represents a different observation. Missing values in the graph indicate that the participant did not give any behavioral response at that frequency pre- and/or post-scan. Original images in panel a) were adapted from [vectorportal.com](https://vectorportal.com) (MRI scanner; CC BY 4.0 license), [svgrepo.com](https://svgrepo.com) (headphones; CC0 license), and [commons.wikimedia.org](https://commons.wikimedia.org) (sinus wave; released into the public domain by Mikael Häggström).

<https://doi.org/10.1371/journal.pone.0309513.g001>

Extended high frequency pure-tone thresholds (9 kHz– 20 kHz) followed a similar behavior to DPOAE amplitudes, with inconsistent changes detected across ears, sessions and subjects. After anatomical scanning sessions (Fig 1, panel b), sub-01 and sub-05 exhibited threshold increases. After functional scanning sessions (Fig 1, panel c), sub-01, sub-05 and sub-06 showed threshold increases. While sub-01 and sub-05 were tested more than once, changes at a given frequency were variable between sessions. Significant improvements in hearing thresholds (i.e., negative threshold shifts) were also observed in some participants (sub-01, 03 and 05) after scanning sessions, particularly after functional scanning sessions. These results were thus not suggestive of subclinical injury, but rather of a high test-retest variability.

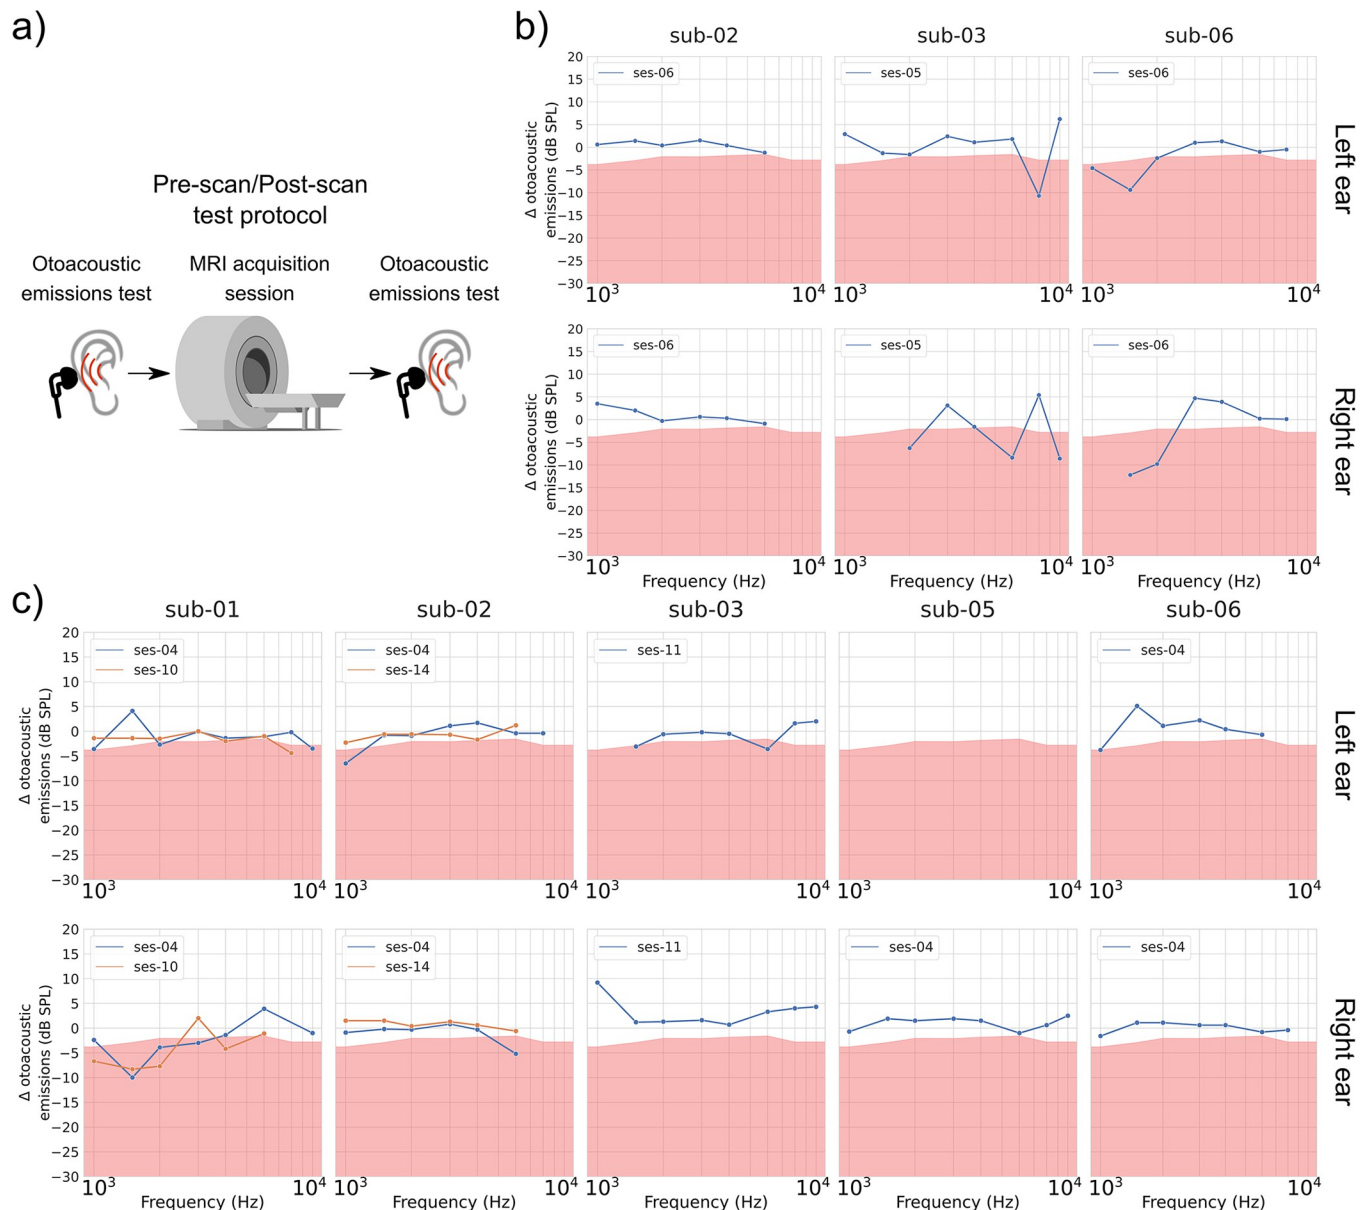

**Fig 2. DPOAE differences (in dB SPL), post-scan minus pre-scan, as a function of the F2 frequency.** a) presents a schematic description of the test session progress. Results are presented for b) anatomical scans and c) functional scans. DPOAE amplitudes are presented for F2 = 1, 1.5, 2, 3, 4, 6, 8 and 10 kHz. For each participant, graphs on the top row are for the left ear, while graphs on the bottom row are for the right ear. Significant amplitude decreases [49] are highlighted with a red background. When multiple observations have been conducted per participant, each line represents a different observation. Missing values in the graph indicate that the participant's DPOAE amplitude did not exceed the established noise floor threshold (see [Methods](#), Otoacoustic emissions section) for that F2 frequency pre- and/or post-scan. Original images in panel a) were adapted from [vectorportal.com](#) (MRI scanner; CC BY 4.0 license), [svgrepo.com](#) (earphones; CC0 license), and [freesvg.org](#) (ear; public domain).

<https://doi.org/10.1371/journal.pone.0309513.g002>

In summary, DPOAE amplitude profiles were inconsistent (between ears, sessions and/or participants) and the extended high frequency pure-tone thresholds exhibited high test-retest variability. Taken together, these results were not indicative of a temporary subclinical effect of MRI noise exposure on the participants' hearing.

## Delayed observations

The goal of the delayed observation was to see if the cumulative scanning sessions have an enduring impact on hearing. To do so, hearing tests supplying clinical (standard pure-tone audiometry) and subclinical (extended high frequency pure-tone audiometry and DPOAE) information on the participants' hearing health were performed in a time frame between 48 hours and 7 days (168 hours; mean = 139.34 hours, SD = 46.92 hours) after a scanning session along the study period. Three participants were tested during this time interval after an anatomical scanning session, and five participants were tested after a functional scanning session. These observations were then compared to the baseline pure-tone thresholds and DPOAE amplitudes acquired at the beginning of the study (January–February 2021). Figs 3 and 4 display the results for the two outcomes: pure-tone thresholds (Fig 3) and DPOAE amplitudes (Fig 4). Table 3 displays the time interval between the baseline session and each of the delayed observations.

**Clinical outcome shows inconsistent long-term impact of MRI noise exposure.** Hearing thresholds acquired during the delayed observations were compared to the baseline thresholds (test session values–baseline values). Using the significance criteria established for this study (see [Methods](#), Pure-tone audiometry section) in connection with anatomical scanning sessions (Fig 3, panel b), two out of the three tested participants (sub-01 and 03) showed no significant increment in hearing thresholds for the standard audiometric frequencies (250 Hz–8 kHz). The third one (sub-06) showed limited and isolated threshold increases. When looking at test sessions linked to functional scans (Fig 3, panel c), four out of the five participants (sub-02, 03, 05 and 06) showed mild increments for at least one tested frequency in the standard range. Detected clinical changes involved different frequencies across participants, as well as different frequencies between the left and right ears. In summary, long-term clinical changes were detected, although these changes were inconsistent.

**Subclinical outcomes show inconsistent long-term impact.** DPOAE amplitudes measured during the delayed observations were compared to the reference values acquired during the baseline session (test session values–baseline values). Based on the test-retest variability criterion used for this study (see [Methods](#), Otoacoustic emissions section), DPOAE amplitudes at some frequencies showed significant reductions in the delayed observations when compared with the baseline. However, such reductions were mainly in isolated frequencies. Individual data shows that sub-01 exhibited DPOAE amplitude reductions up to around 9 dB SPL in the right ear (for F2 = 10 kHz). Sub-03 showed a maximum reduction of 10.5 dB SPL for F2 = 1 kHz (left ear) and 13 dB SPL for F2 = 2 kHz (right ear). Finally, sub-06 showed maximum DPOAE amplitude reductions in the right ear of 26.7 and 21.7 dB SPL for F2 = 1.5 and 2 kHz, respectively. All other DPOAE frequencies either showed amplitude reductions that did not exceed 5 dB SPL or did not show amplitude reductions in both ears. It should also be noted that DPOAE amplitudes for some F2 frequencies in some subjects significantly improved (i.e., higher amplitudes) after a scan session.

Regarding the extended high frequencies (9–20 kHz), mild significant increments in hearing thresholds were observed in four of the five tested subjects in at least one ear (see Fig 3). In addition, 20-dB-HL increments in hearing threshold were observed with sub-01, sub-02, and sub-03. However, for sub-01 and 02, hearing thresholds in these frequencies improved in subsequent testing sessions and fell within the range of mild threshold shift (sub-02) or within the test-retest variability (sub-01). It can also be observed in Fig 3 that delayed observations showed better hearing thresholds (i.e., lower hearing thresholds) in some follow-up sessions than during the baseline. All such improvements in hearing thresholds did not exceed 10 dB HL.

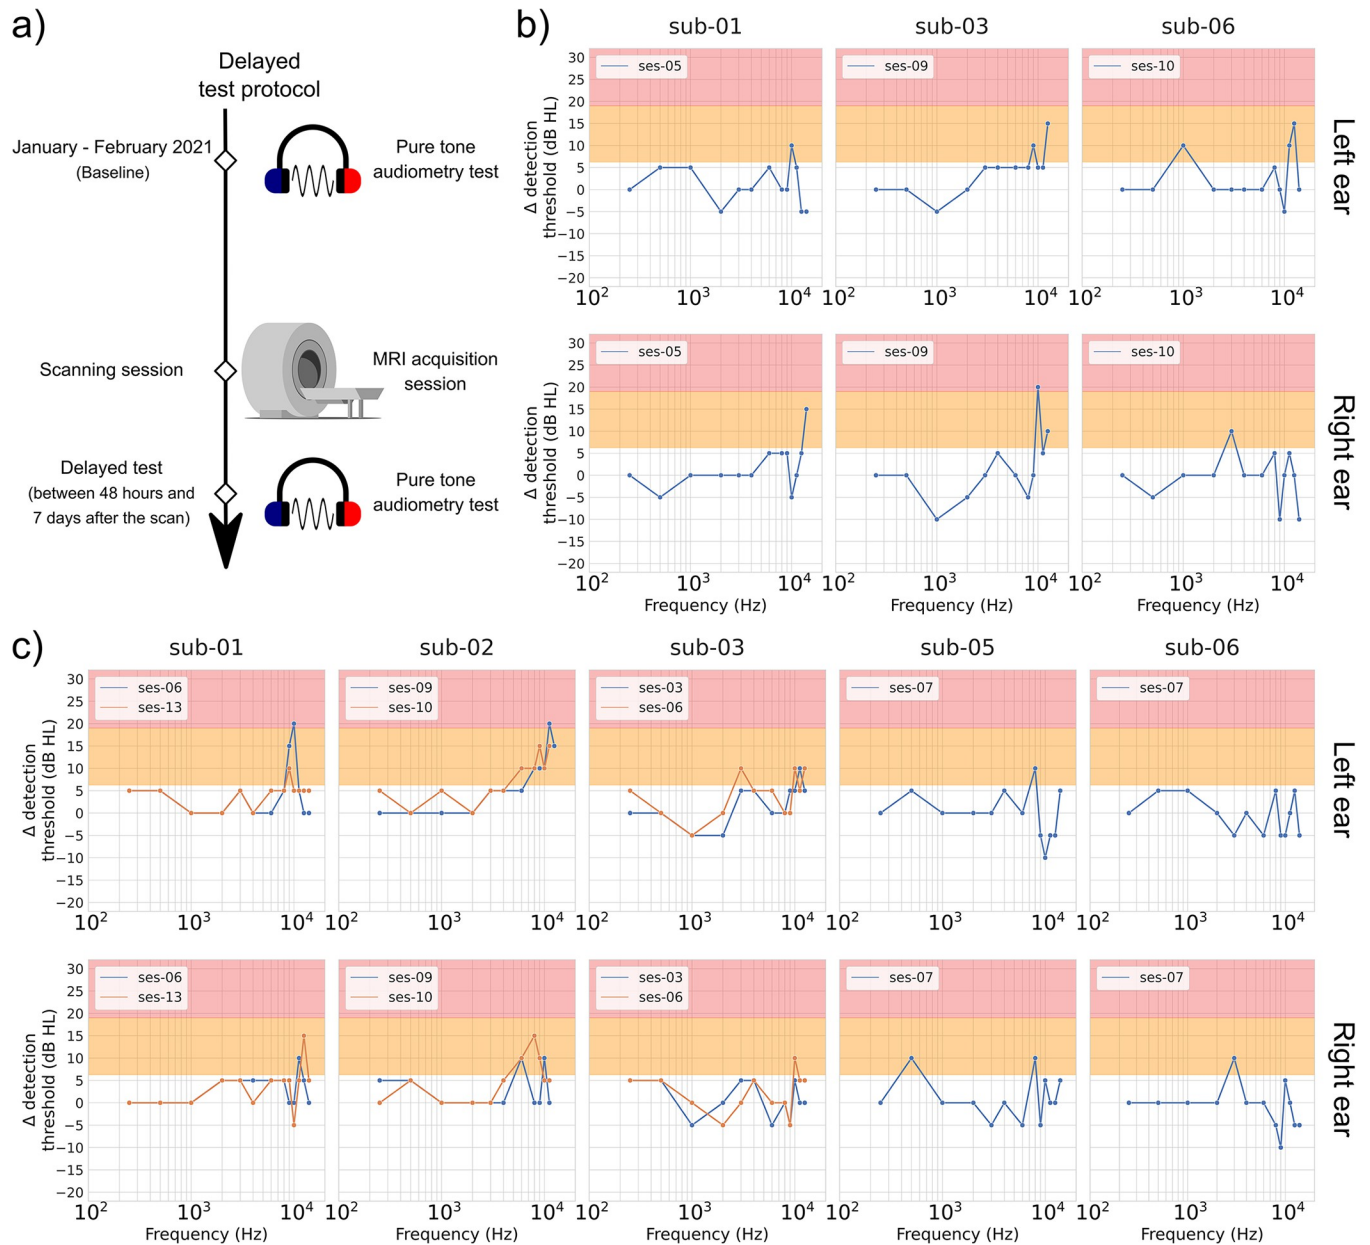

**Fig 3. Pure-tone audiometric threshold differences (in dB HL), delayed observation minus baseline, as a function of the pure-tone frequency.** a) presents a schematic description of the test session progress. Results are presented for b) anatomical scans and c) functional scans. Pure-tone threshold results are presented for both standard (0.25, 0.5, 1, 2, 3, 4, 6 and 8 kHz) and extended high frequency (9, 10, 11.2, 12.5, 14, 16, 18, and 20 kHz) ranges. For each participant, graphs on the top row are for the left ear, while graphs on the bottom row are for the right ear. When multiple observations have been conducted per participant, each line represents a different observation. Worsening hearing thresholds of a mild degree ( $> 5$  but  $< 20$  dB HL) are highlighted with an orange background, while severe increases ( $\geq 20$  dB HL) are highlighted with a red background. Missing values in the graph indicate that the participant did not give any behavioral response at that frequency during the delayed observation and/or the baseline. Original images in panel a) were adapted from [vectorportal.com](https://vectorportal.com) (MRI scanner; CC BY 4.0 license), [svgrepo.com](https://svgrepo.com) (headphones; CC0 license), and [commons.wikimedia.org](https://commons.wikimedia.org) (sinus wave; released into the public domain by Mikael Häggström).

<https://doi.org/10.1371/journal.pone.0309513.g003>

In summary, the DPOAE delayed observations present two types of amplitude patterns: a more unstable pattern with both significant amplitude increases and decreases, and a more stable one closer to the amplitude variation's neutral point (a 0-dB-SPL difference). These

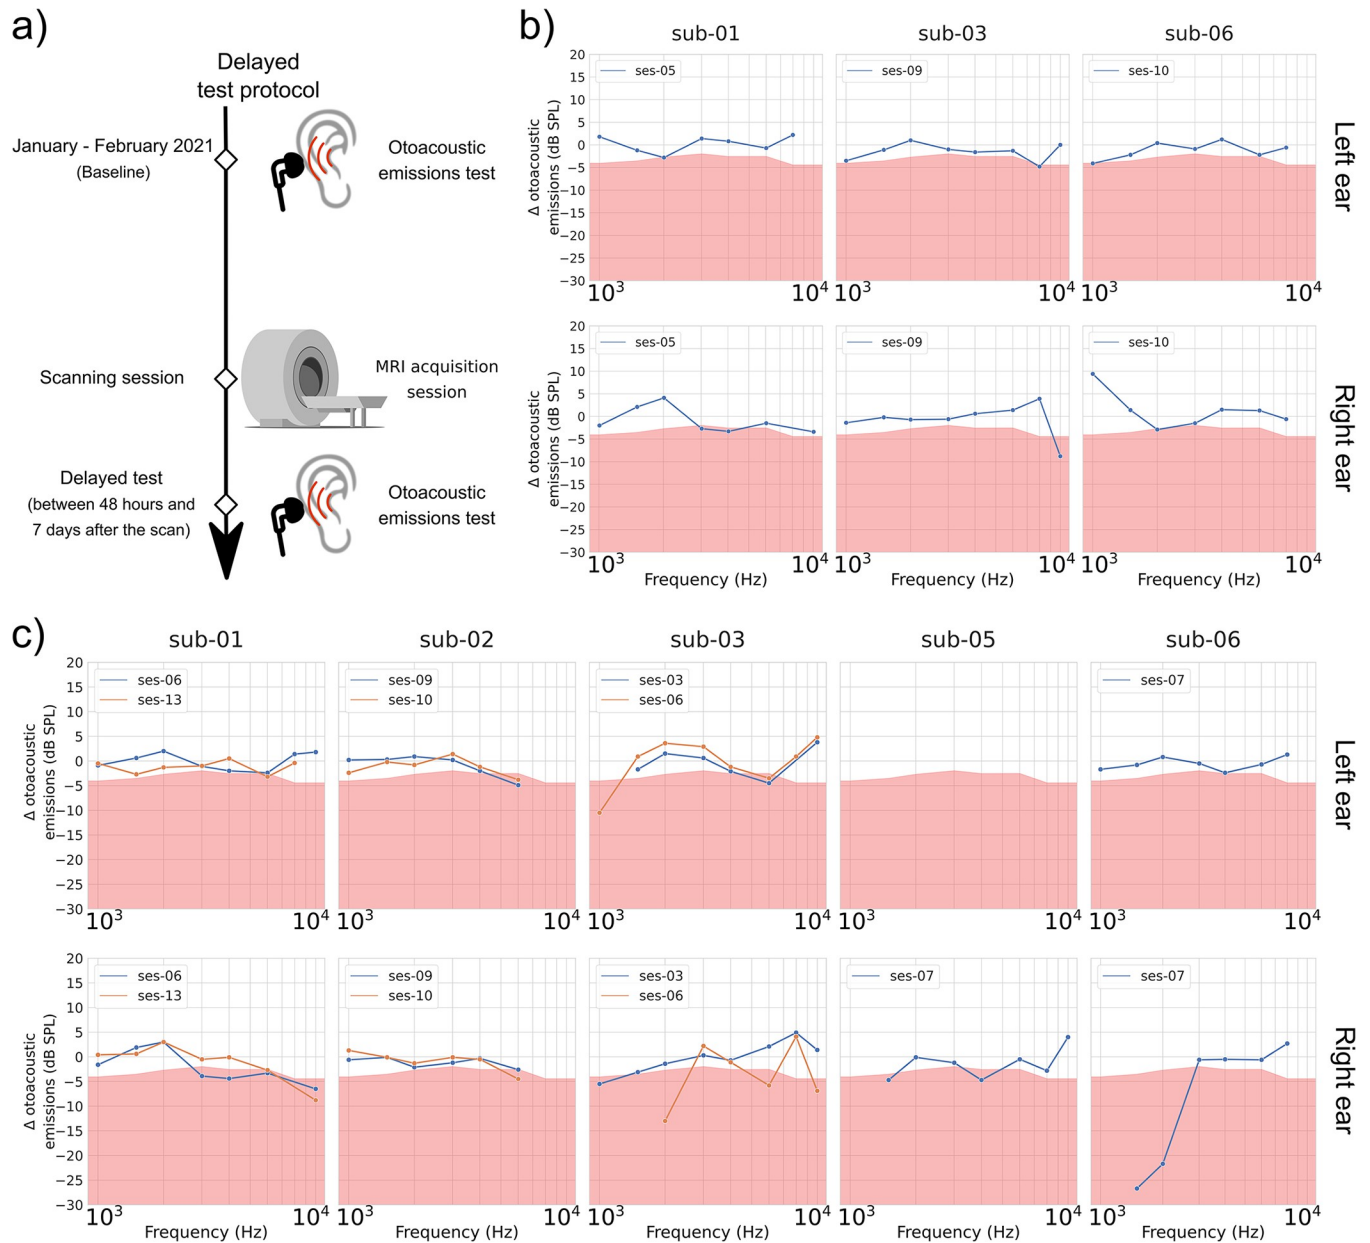

**Fig 4. DPOAE differences (in dB SPL), delayed observation minus baseline, as a function of the F2 frequency.** a) presents a schematic description of the test session progress. Results are presented for b) anatomical scans and c) functional scans. DPOAE amplitudes are presented for F2 = 1, 1.5, 2, 3, 4, 6, 8 and 10 kHz. For each participant, graphs on the top row are for the left ear, while graphs on the bottom row are for the right ear. Significant amplitude decreases [49] are highlighted with a red background. When multiple observations have been conducted per participant, each line represents a different observation. Missing values in the graph indicate that the participant’s OAE response did not exceed the established noise floor threshold (see [Methods](#), Otoacoustic emissions section) for that F2 frequency during the delayed observation and/or the baseline. Original images in panel a) were adapted from [vectorportal.com](#) (MRI scanner; CC BY 4.0 license), [svgrepo.com](#) (earphones; CC0 license), and [freesvg.org](#) (ear; public domain).

<https://doi.org/10.1371/journal.pone.0309513.g004>

inconsistent DPOAE amplitude patterns (between ears, sessions and/or participants), when combined with the also inconsistent extended high frequencies’ patterns of threshold gains/losses and apparent greater test-retest variability, show no consistent long-term subclinical effect of the exposure to the MRI scanner noise.

**Table 3. Time intervals between the baseline session and the delayed observations.**

| Participant | Session ID | Delay (from the baseline) |
|-------------|------------|---------------------------|
| Sub-01      | ses-05     | 2 months, 3 days          |
|             | ses-06     | 3 months, 18 days         |
|             | ses-13     | 12 months, 23 days        |
| Sub-02      | ses-09     | 4 months, 4 days          |
|             | ses-10     | 7 months, 24 days         |
| Sub-03      | ses-03     | 1 month, 3 days           |
|             | ses-06     | 2 months, 15 days         |
|             | ses-09     | 8 months, 21 days         |
| Sub-05      | ses-07     | 2 months, 21 days         |
| Sub-06      | ses-07     | 3 months, 0 day           |
|             | ses-10     | 8 months, 1 day           |

<https://doi.org/10.1371/journal.pone.0309513.t003>

## Discussion

### Overview of the results

The aim of this study was to evaluate possible clinical and subclinical effects on hearing of intensive exposure to scanner noise. To investigate this, participants got their hearing tested immediately before and after scan sessions (to test short-term effects) as well as after a period of at least 48 hours (to test long-term effects).

Overall, observations on short-term effects showed no significant clinical impact of the exposure to the scanner noise on standard pure-tone thresholds (250 Hz– 8 kHz). Observations on short-term subclinical changes, combining DPOAE amplitudes and extended high frequency pure-tone thresholds (9 kHz– 20 kHz), showed no consistent effect of the noise exposure.

The delayed observations showed inconsistent effect of the noise exposure on both the clinical (standard pure-tone thresholds) and the subclinical observations (DPOAE amplitudes and extended high frequency pure-tone thresholds combination).

### Temporary changes in hearing outcomes

As previously mentioned, the clinical pure-tone thresholds (250 Hz– 8 kHz) obtained in this protocol did not show a short-term impact of scanner noise exposure since most of the threshold variations measured for this outcome during this period fell within the test-retest variability criteria or presented an improvement after the scan.

The subclinical short-term effects were evaluated with the combination of two hearing tests: the DPOAE amplitudes and the extended high frequency pure-tone thresholds (9 kHz– 20 kHz). Since the DPOAE test is an objective evaluation that does not require any form of behavioral response from participants, the level of fatigue is not likely to have a significant impact on the outcome. The inconsistent results obtained for this test seem to relate to a hypothesis raised by Govindaraju et al. [54] when they reported a case study of a subject who complained about a blocked sensation followed by tinnitus in his right ear, but no subjective hearing loss, following a 41-minute anatomical scan of his lower back. The subject used foam plugs during the scan, but a pure-tone audiometry test performed the next day revealed sensorineural hearing loss on the right side, supporting the subject's complaint and showing a possibly permanent impact of the exposure to MRI noise. The lateralized impact presented in that report could suggest an improperly placed earplug in the affected ear, but the absence of a pre-scan reference prevents the complete exclusion of possible pre-existing, undocumented

hearing loss. They hypothesized that a lateralized incorrect use of hearing protection could possibly have decreased its efficiency, highlighting the importance of the proper placement and adjustment of hearing protection devices. In our study, the DPOAE amplitudes showed some impacts for some participants, but the lack of between-ears and between-sessions consistencies seem to also indicate a hearing protection device placement issue that could momentarily have affected the results for a specific ear during a specific session. A less than optimal placement of the hearing protection equipment or a problem in the fitting of the foam canal tip due to an inadequate choice of size for the participant's auditory canal can probably be linked to some of these observations through a diminished effectiveness of the noise reduction. Moreover, the different patterns observed between the two ears that three of the participants showed for this type of observation tend to support this idea that on one side, the protection must have been properly installed, while the other side was not sealed properly, affecting the sound spectrum reaching the ear. Yildirim et al. [55] showed that the impact of 3 T MRI noise on DPOAEs was only temporary and located in the higher spectrum of the tested frequencies (2, 6 and 8 kHz). Therefore, we would also expect this frequency range to be affected prior to the lower ones [56], which was not our case. Another source of variability in our study may be associated with the occlusion effect generated by the use of earphones during MRI testing. As with the effectiveness of the noise reduction, the importance and impact of the occlusion effect depend on the placement of the earphone inserts in the ear canal [57]. This effect increases the amount of energy reaching the tympanic membrane through bone conduction. The impact of the occlusion effect may vary depending on the specific MRI sequences used, as each sequence generates different levels of vibration and noise. This variability could have influenced our results and limited our ability to accurately interpret the data (see below for a detailed discussion on this limitation).

For the second subclinical test (extended high frequency thresholds), a subset of the participants exhibited mild and/or severe threshold increases for some of their observations, while others did not. This frequency range is known to be most sensitive to early hearing loss, and may be an indicator of possible future damage if the exposure continues [29]. Sub-05 was tested more intensively than other participants to make sure that pre-existent hearing loss was not made worse by the scanning protocol. They are the only participant that crossed the 20-dB-HL severe shift boundary [39] in one session, in connection with an anatomical scan, but they otherwise mostly showed negligible changes ( $\leq 5$  dB HL) or even improvements. Their results allowed us to see that frequencies showing threshold increases in the extended high frequency range also happened to show threshold decreases for those frequencies throughout the different sessions, suggesting a greater test-retest variability for this range than for the standard frequencies. A greater variability could also mean that the data points that would seem to be alarming could also be the product of a statistical phenomenon linked to the important number of tested frequencies and test sessions [58]. In this situation, it is expected that some measures might deviate enough to be considered significant, even in the absence of an effect. With more measures also come more individually deviant measures, but the ratio of deviant measures to the total amount of measures is generally stable [58]. Since the scanning sessions take place in a noisy environment, even with the use of hearing protection, significant improvements in the pure-tone thresholds are not the expected outcome. This wider, statistically counterbalanced distribution of measures (with both significant threshold increases and significant threshold decreases) for the extended high frequencies supports a larger test-retest variability than for the standard frequencies.

Another factor that could have an impact on variability associated with this test is the participants' increasing level of fatigue. When participants would go through testing (pure-tone audiometry) for possible short-term changes on top of the scan session, they would spend

between 3.75 and 5.25 hours at the research center, doing all kinds of tasks in and out of the scanner. Since pure-tone audiometry is a task that requires a certain level of focus and effort, it is possible that some participants showed a drop of energy, motivation, and/or attention at some point in the process, thus impacting the results. The extended high frequencies can already be hard to detect for some people. When their attention is running low, the possibility that detection thresholds increase can also increase. Therefore, we conclude that most of the increases observed in the extended high frequencies would fall within the greater test-retest variability of this range. Because the affected frequencies were inconsistent either within or between participants, we also conclude an absence of clear loss in hearing threshold immediately after exposure to an MRI scan. Moreover, if any of the observed increases had become permanent, they should also have been consistently observed in the delayed observations.

These findings confirm the results presented by Lim et al. [59] in their study on the impact of 3 T scanner noise exposure on extended high-frequency hearing thresholds. For their study, they recruited 35 patients undergoing a variety of head and neck MRI acquisition sessions. Pure-tone thresholds up to 14 kHz were acquired before and after their MRI session, and the patients wore foam earplugs during the MRI session. They did not detect statistically significant threshold shifts for 8, 10, 12 and 14 kHz [59], which seems to align with our findings, even though their participants were scanned for shorter periods (mean = 27 minutes 52 seconds, SD = 6 minutes 40.22641 seconds, range: from 17 minutes 20 seconds to 46 minutes 50 seconds).

### Permanent changes in hearing outcomes

The second experimental condition used to evaluate the potential clinical and subclinical impact of MRI noise exposure (with hearing protection) supplied a portrait of the possible long-term impact of this exposure. For such impacts to be considered linked to the MRI noise exposure, short-term impacts should also have been observed for the same frequencies and these impacts should be present during subsequent delayed observations. The clinical pure-tone thresholds obtained during the delayed observations showed isolated and inconsistent (between ears, sessions and/or participants) differences. These few significant threshold shifts could be related to the scanner noise exposure, but could also be linked to noise exposure that occurred outside of the scanning context in the time interval between the baseline acquisition session (January–February 2021) and a specific long-term observation. Their limited number could also be an indication of a statistical phenomenon due the large number of tested frequencies and observations [58].

Similarly, subclinical long-term tests also showed inconsistent effects of the MRI noise exposure. As with short-term observations, subclinical effects were evaluated with the combination of the DPOAE amplitudes and the extended high frequency pure-tone thresholds (9 kHz–20 kHz). The observations on long-term changes of DPOAE amplitudes mostly showed small or no deterioration of the emissions, but some participants showed great within-session variability for some sessions that was absent from other time points. It is also possible to notice that some of the participants are systematically missing values in the higher tested F2 frequencies. This last effect could in part be attributed to the normal ageing process linked with day-to-day noise exposure [50], but a part could also be linked to noise-induced (by the scanner or other noise sources) fatigue of the outer hair cells of the cochlea. Repeated deterioration profiles like the one that can be seen for sub-02 (for F2 = 8 and 10 kHz) could be an indicator that this participant might have had a time-enduring decrease of the outer hair cells of the cochlea in this specific frequency range, since the observations on short-term changes show similar



missing values and the rest of their tested frequencies show results closer to or within test-retest variability.

On the opposite side, different inter-session patterns like what can be observed in sub-03's results (see Fig 4, panel c) could be another indicator of an improper fitting of the hearing protection equipment during some of the scan sessions since notches are present at different frequencies and ear sides from the first session (ses-03) to the second session (ses-06). This type of result highlights the importance of the use and proper placement of hearing protection equipment while exposed to MRI noise. A similar phenomenon could also be present with sub-06. In one session, sub-06 showed a deterioration in DPOAE amplitudes (see Fig 4, panel c: ses-07) only for one ear, while such deterioration was completely gone at a later session (see Fig 4, panel b: ses-10), leaving DPOAE amplitudes improvements instead. Even though anatomical and functional scans do not use the same types of acquisition sequences, thus resulting in different noise exposures, there should not be such different within-participant response profiles between those two sessions if the protection equipment was properly installed for both of them.

Extended high frequency thresholds (9 kHz– 20 kHz) also showed inconsistent noise exposure effects. Threshold increases observed in the extended high frequencies were of greater magnitude (between 10 and 20 dB HL) than those observed in the conventional frequencies (250 Hz– 8 kHz; between 10 and 15 dB HL), but similarly to the short-term extended high frequency thresholds, results showed a greater test-retest variability for this frequency range. The repeated exposure to the scanner noise since the baseline data were acquired could play a role, important or not, in the threshold shifts measured during the delayed observations. On the other hand, other factors like the participants' level of fatigue during the test session or noise exposure from other contexts than the MRI could also be sources of difference. The more frequent changes observed in the extended high frequency spectrum (> 8 kHz) are also compatible with age-related hearing thresholds shifts [60], although the duration of this study would not support this factor as the main reason for these changes [60]. Then again, just as it was possible to observe improvements in the extended high frequencies during the observations on short-term changes, observations on long-term changes also showed some improvements of the pure-tone thresholds in that frequency range. While 9, 10 and 12.5 kHz seem to be the most frequently impacted frequencies in the extended high frequency range, 9 and 10 kHz also showed improvements for some participants. Therefore, there seems to be no consistent pattern related to threshold gains or losses either between participants, sessions and/or ears in the delayed observations, supporting the inference that there is greater test-retest variability for this range of frequencies, even though prior studies showed the opposite [38, 61]. Unfortunately, those studies had limited numbers of retest sessions (Schmuziger et al. [38]: two intrasessions (one for each of the two pieces of stimuli presentation equipment used); Mishra et al. [61]: one intrasession (within 1 to 4 hours) and one intersession (within 1 to 12 days, mean = 10)), giving a limited picture of the test-retest variability of the extended high frequency pure-tone thresholds. The larger number of test sessions presented in this study could explain why the phenomenon was not observed in these previous studies. Nonetheless, losses in this frequency range are known to be linked with the ageing process of the cochlea [62], and their presence following noise exposure may be an indicator of future permanent damage. Therefore, special attention should be paid to this frequency range in any hearing conservation protocol.

When looking at the combination of the DPOAE amplitudes and extended high frequency thresholds, it is possible to conclude that the isolated amplitude decreases and rightfully significant threshold increases are more probably linked to the one-time effect of an improper equipment fit or an exposure to noise outside of the scanner's context.

In summary, considering the absence of a consistent clinical and subclinical impact of the noise exposure on the different tests, we propose that the long-term threshold and DPOAE amplitudes shifts we observe are not likely to be directly attributed to scanning sessions' noise, and rather that they are likely the result of a combination of elements led by the exposure to other day-to-day noise sources, isolated cases of improper hearing protection use and the large number of data points that are compared.

## Limitations

In light of the inconsistencies reported in the results section and the methodology used to acquire the data through an already ongoing research platform, it was hard to reach a definitive conclusion and it came with several limitations. As mentioned before, one of the main limitations comes from the hearing protection devices. It has been shown that if the users are not properly trained on how to use them or if they are not placed properly, their efficiency varies drastically [63, 64]. This is why Hayes et al. [63] recommend the implementation of training and fit tests for hearing protection users. Kozlowski et al. [65] brought up the idea of a simple and affordable tester to verify the placement of earplugs. These procedures could limit the variability of the placement and, therefore, limit the variability in the efficiency of the equipment used.

It was also mentioned before that pure-tone audiometry has an inherent limitation. As it is a test where participants are required to give a form of behavioral response, their levels of fatigue, attention and motivation can all have an impact on the quality and accuracy of the results it provides.

The next main limitation is linked to the enduring nature of the project. Participants are exposed to the scanner noise, but also to noise coming from other sources throughout the week. It is impossible to completely control their exposure, and keeping a record of every exposure over a timespan of multiple years would also be a great challenge. While the observations on short-term changes are mostly immune to this bias, the results from observations on long-term changes are directly impacted by the noise exposure in the period between the scan session and the hearing test session, but also by the general exposure that occurred since the baseline data were acquired.

Another important limitation mentioned above relates to the occlusion effect caused by the use of insert earphones during the MRI procedures. The occlusion effect refers to the amplification of low-frequency sounds that occurs when the outer part of the ear canal is blocked, as happens when insert earphones are used. This blockage traps sound waves inside the ear canal, leading to an increase in the perception of one's own voice and other internal sounds. Additionally, external low-frequency noises, such as the noise and vibrations produced by an MRI machine, can be intensified due to the occlusion effect. In the context of our research, we may expect around a 20–30 dB occlusion effect boost due to the noise and vibration from the scanner [57]. This amount is similar to the attenuation of air conduction provided by the hearing protection utilized by the participants during MRI testing, although such levels may vary depending on the actual levels of noise and vibration emitted by each MRI sequence. The occlusion effect can be measured by comparing the level of sound pressure in the ear canal with and without the ear canal being occluded. This measurement typically involves using a probe microphone placed near the tympanic membrane to assess the increase in SPL when the ear canal is blocked by an insert earphone. In our study, while we provided participants with hearing protection to mitigate the loud noises generated by the MRI machine, we did not measure the degree to which the occlusion effect might have boosted the energy from the MRI noise and vibrations. This is a significant limitation as it introduces uncertainty regarding the

actual noise exposure experienced by participants. The potential enhancement of low-frequency sounds due to the occlusion effect could mean that participants' ears were subjected to higher levels of noise than we accounted for, possibly affecting our findings related to hearing changes. Future studies should consider measuring the occlusion effect to more accurately gauge the noise exposure participants receive during MRI scans. By doing so, we can better understand the potential impact on hearing and account for any amplification of sound caused by the occlusion effect, leading to more accurate and reliable results.

Finally, the last limitation is regarding the ability to generalize these findings. First, this research project primarily involved middle-aged individuals. The effect of MRI noise exposure may vary depending on individual susceptibility to noise. In particular, older adults have an increased vulnerability to loud sounds and thus may be more susceptible to noise exposure due to various factors [66]. Since we did not include older adults in this study, the results should be interpreted with caution when applied to this population. Previous case reports on older patients undergoing Vestibular Evoked Myogenic Potential (VEMP) testing, which uses high levels of noise similar to MRI, have shown hearing losses induced by VEMP sound stimulation [66, 67]. Second, as this research project is part of a larger intensive research platform, the number of participants willing to commit to weekly MRI scans and regular auditory tests was limited. Consequently, not all participants could be tested under all experimental conditions for a sufficient amount of time to provide enough power to generalize these results properly.

Despite these limitations, this study offers a unique opportunity to study the impact of MRI noise with an unprecedented amount of exposure.

## Implications and future work

In light of the observations made possible by this research protocol, the participants of the Courtois NeuroMod project will continue their scanning regimen, and their hearing is still going to be tested, although at a less intensive rate, to ensure their continued welfare. To address the possibility of occasional improper use of the hearing protection devices, participants were given training to ensure they all use them adequately. The MRI operators will also be trained to pay attention to the proper placement of protective equipment. We also plan to evaluate the occlusion effect created in the ear canal in connection with the use of hearing protection and to quantify the level of protection granted by our hearing protection combination. The CNeuroMod project being an intensive research initiative, the relative absence of change observed in this research project suggests that patients going through single, shorter scan sessions are very unlikely to suffer adverse consequences. In a broader view, hearing research using pure-tone audiometry would greatly benefit from a clearer, per-frequency test-retest variability criteria, especially in the extended high frequencies where no clear guideline is currently available.

## Conclusion

In conclusion, the results of our study indicate that the Courtois NeuroMod project is not likely to cause hearing damage to its research participants. Although these results might not be able to be generalized to other contexts, they still provide a portrait of this specific situation to other researchers interested in deep and dense dataset projects as well as to clinicians using MRI. The importance of proper hearing protection use and placement linked to the intensity and duration of the exposure is also reiterated.

## Supporting information

**S1 Fig. Sub-05 hearing impairment description.** This participant shows, for the left ear, a mostly flat audiometric configuration, with a moderate degree (30 to 40 dB HL) of hearing loss for the 0.25–6 kHz range, while the right ear shows normal hearing thresholds for the 0.25–8 kHz frequency range.

(DOCX)

**S1 Table. Pure-tone's significant-threshold-shift criteria comparison.** Comparison between different pure-tone significant-threshold-shift criteria mentioned in Methods' Pure-tone audiometry section.

(DOCX)

## Acknowledgments

The Authors would like to thank Peer Herholz for his feedback during the preparation of this manuscript.

## Author Contributions

**Conceptualization:** Julie A. Boyle, Adrian Fuente.

**Formal analysis:** Eddy Fortier.

**Funding acquisition:** Pierre Bellec, Julie A. Boyle.

**Investigation:** Eddy Fortier, Adrian Fuente.

**Methodology:** Eddy Fortier, Pierre Bellec, Julie A. Boyle, Adrian Fuente.

**Project administration:** Eddy Fortier, Julie A. Boyle.

**Resources:** Julie A. Boyle.

**Software:** Eddy Fortier.

**Supervision:** Pierre Bellec, Adrian Fuente.

**Visualization:** Eddy Fortier.

**Writing – original draft:** Eddy Fortier.

**Writing – review & editing:** Eddy Fortier, Pierre Bellec, Julie A. Boyle, Adrian Fuente.

## References

1. Imura T, Mitsutake T, Hori T, & Tanaka R. Predicting the prognosis of unilateral spatial neglect using magnetic resonance imaging in patients with stroke: A systematic review. *Brain Res* [Internet]. 2022; 1789:147954. Available from: <https://doi.org/10.1016/j.brainres.2022.147954> PMID: 35644219
2. Liu CK, Miller BL, Cummings JL, Mehinger CM, Goldberg MA, Howng SL, et al. A quantitative MRI study of vascular dementia. *Neurology* [Internet]. 1992; 42(1):138–143. Available from: <https://doi.org/10.1212/wnl.42.1.138> PMID: 1734295
3. Doran M, & Bydder GM. Magnetic resonance: Perfusion and diffusion imaging. *Neuroradiology* [Internet]. 1990; 32(5):392–398. Available from: <https://doi.org/10.1007/BF00588472> PMID: 2259433
4. Koch PJ, Girard G, Brügger J, Cadic-Melchior AG, Beanato E, Park CH, et al. (2022). Evaluating reproducibility and subject-specificity of microstructure-informed connectivity. *NeuroImage* [Internet]. 2022; 258:119356. Available from: <https://doi.org/10.1016/j.neuroimage.2022.119356> PMID: 35659995
5. Thomsen C, Henriksen O, & Ring P. In vivo measurement of water self diffusion in the human brain by magnetic resonance imaging. *Acta radiol*. 1987; 28(3):353–361. PMID: 2958045

6. Kwong KK, Belliveau JW, Chesler DA, Goldberg IE, Weisskoff RM, Poncelet BP, et al. Dynamic magnetic resonance imaging of human brain activity during primary sensory stimulation. *Proc Natl Acad Sci U S A* [Internet]. 1992; 89(12):5675–5679. Available from: <https://doi.org/10.1073/pnas.89.12.5675> PMID: 1608978
7. May L, Halpern AR, Paulsen SD, & Casey MA. Imagined musical scale relationships decoded from auditory cortex. *J Cogn Neurosci* [Internet]. 2022; 34(8):1326–1339. Available from: [https://doi.org/10.1162/jocn\\_a\\_01858](https://doi.org/10.1162/jocn_a_01858) PMID: 35554552
8. Ogawa S, Tank DW, Menon R, Ellermann JM, Kim SG, Merkle H, et al. Intrinsic signal changes accompanying sensory stimulation: Functional brain mapping with magnetic resonance imaging. *Proc Natl Acad Sci U S A* [Internet]. 1992; 89(13):5951–5955. Available from: <https://doi.org/10.1073/pnas.89.13.5951> PMID: 1631079
9. McJury M, & Shellock FG. Auditory noise associated with MR procedures: A review. *J Magn Reson Imaging* [Internet]. 2000; 12(1):37–45. Available from: [https://doi.org/10.1002/1522-2586\(200007\)12:1<37::AID-JMRI5>3.0.CO;2-I](https://doi.org/10.1002/1522-2586(200007)12:1<37::AID-JMRI5>3.0.CO;2-I) PMID: 10931563
10. Price DL, De Wilde JP, Papadaki AM, Curran JS, & Kitney RI. Investigation of acoustic noise on 15 MRI scanners from 0.2 T to 3 T. *J Magn Reson Imaging* [Internet]. 2001; 13(2):288–293. Available from: [https://doi.org/10.1002/1522-2586\(200102\)13:2<288::AID-JMRI1041>3.0.CO;2-P](https://doi.org/10.1002/1522-2586(200102)13:2<288::AID-JMRI1041>3.0.CO;2-P) PMID: 11169836
11. Ulmer JL, Biswal BB, Mark LP, Mathews VP, Prost RW, Millen SJ, et al. Acoustic echoplanar scanner noise and pure tone hearing thresholds: The effects of sequence repetition times and acoustic noise rates. *J Comput Assist Tomogr* [Internet]. 1998; 22(3):480–486. Available from: <https://doi.org/10.1097/00004728-199805000-00022> PMID: 9606392
12. Radomskij P, Schmidt MA, Heron CW, & Prasher D. Effect of MRI noise on cochlear function. *Lancet* [Internet]. 2002; 359(9316):1485–1486. Available from: [https://doi.org/10.1016/s0140-6736\(02\)08423-4](https://doi.org/10.1016/s0140-6736(02)08423-4) PMID: 11988249
13. U.K. Health Protection Agency, Centre for Radiation, Chemical and Environmental Hazards. Protection of patients and volunteers undergoing MRI procedures: Advice from the Health Protection Agency. Publication No. RCE-7 [Internet]. Didcot: U.K. Health Protection Agency; 2008. Available from: [https://assets.publishing.service.gov.uk/government/uploads/system/uploads/attachment\\_data/file/329364/Protection\\_of\\_patients\\_and\\_volunteers\\_undergoing\\_MRI\\_procedures.pdf](https://assets.publishing.service.gov.uk/government/uploads/system/uploads/attachment_data/file/329364/Protection_of_patients_and_volunteers_undergoing_MRI_procedures.pdf)
14. Herholz P, Fortier E, Toneva M, Farrugia N, Wehbe L, & Borghesani V. (2023). A roadmap to reverse engineering real-world generalization by combining naturalistic paradigms, deep sampling, and predictive computational models. *Neuron Behav Data Anal Theory* [Internet]. 2023. Available from: <https://doi.org/10.51628/001c.67879>
15. Gratton C, & Braga RM. Editorial overview: Deep imaging of the individual brain: past, practice, and promise. *Curr Opin Behav Sci* [Internet]. 2021; 40:iii–vi. Available from: <https://doi.org/10.1016/j.cobeha.2021.06.011>
16. Naselaris T, Allen E, & Kay K. Extensive sampling for complete models of individual brains. *Curr Opin Behav Sci* [Internet]. 2021; 40:45–51. Available from: <https://doi.org/10.1016/j.cobeha.2020.12.008>
17. Gratton C, & Braga RM, editors. Deep Imaging—Personalized Neuroscience. *Curr Opin Behav Sci* [Internet]. 2021; 40. Available from: <https://www.sciencedirect.com/journal/current-opinion-in-behavioral-sciences/vol/40/suppl/C>
18. Thirion B, Thual A, & Pinho AL. From deep brain phenotyping to functional atlasing. *Curr Opin Behav Sci* [Internet]. 2021; 40:201–212. Available from: <https://doi.org/10.1016/j.cobeha.2021.05.004>
19. Jin C, Li H, Li X, Wang M, Liu C, Guo J, et al. Temporary hearing threshold shift in healthy volunteers with hearing protection caused by acoustic noise exposure during 3-T multisequence MR neuroimaging. *Radiology* [Internet]. 2018; 286(2):602–608. Available from: <https://doi.org/10.1148/radiol.2017161622> PMID: 28813235
20. U.S. Department of Health and Human Services, Public Health Service, Centers for Disease Control and Prevention, National Institute for Occupational Safety and Health. Criteria for a Recommended Standard: Occupational Noise Exposure (Revised Criteria 1998). DHHS (NIOSH) Publication No. 98–126 [Internet]. Cincinnati: U.S. Department of Health and Human Services; 1998. Available from: <https://www.cdc.gov/niosh/docs/98-126/pdfs/98-126.pdf>
21. European Parliament and Council. Consolidated text: Directive 2003/10/EC of the European Parliament and of the Council of 6 February 2003 on the minimum health and safety requirements regarding the exposure of workers to the risks arising from physical agents (noise) (Seventeenth individual Directive within the meaning of Article 16(1) of Directive 89/391/EEC). EUR-Lex Document no. 02003L0010-20190726 [Internet]. EUR-Lex: European Union; 2019. Available from: <https://eur-lex.europa.eu/eli/dir/2003/10/2019-07-26>

22. Fligor B, Chasin M, & Neitzel R. Noise exposure. In: Katz J, Chasin M, English K, Hood LJ, & Tillery KL, editors, *Handbook of clinical audiology*. 7th ed. Philadelphia: Wolters Kluwer Health; 2015. p. 595–616.
23. Melnick W. Human temporary threshold shift (TTS) and damage risk. *J Acoust Soc Am* [Internet]. 1991; 90(1):147–154. Available from: <https://doi.org/10.1121/1.401308> PMID: 1880282
24. Ward WD, Glorig A, & Sklar DL. Dependence of temporary threshold shift at 4 kc on intensity and time. *J Acoust Soc Am* [Internet]. 1958; 30(10):944–954. Available from: <https://doi.org/10.1121/1.1909414>
25. Le Prell CG, & Bao J. Prevention of noise-induced hearing loss: Potential therapeutic agents. In: Le Prell CG, Henderson D, Fay RR, & Popper AN, editors. *Springer handbook of auditory research*. Vol. 40. Noise-Induced Hearing Loss. New York: Springer; 2012. p. 285–338. Available from: [https://doi.org/10.1007/978-1-4419-9523-0\\_13](https://doi.org/10.1007/978-1-4419-9523-0_13)
26. Le Prell CG, Dell S, Hensley B, Hall JW, Campbell KC, Antonelli PJ, et al. Digital music exposure reliably induces temporary threshold shift in normal-hearing human subjects. *Ear Hear* [Internet]. 2012; 33(6):e44–e58. Available from: <https://doi.org/10.1097/AUD.0b013e31825f9d89> PMID: 22885407
27. FAQs: A useful set of audiology and hearing loss frequently asked questions [Internet]. British Society of Audiology; [date unknown]. Available from: <https://www.thebsa.org.uk/public-engagement/faqs/>
28. Deafness and hearing loss [Internet]. World Health Organization; [updated 2021 Apr 1]. Available from: <https://www.who.int/news-room/fact-sheets/detail/deafness-and-hearing-loss>
29. Sulaiman AH, Husain R, & Seluakumaran K. Evaluation of early hearing damage in personal listening device users using extended high-frequency audiometry and otoacoustic emissions. *Eur Arch Otorhinolaryngol* [Internet]. 2014; 271(6):1463–1470. Available from: <https://doi.org/10.1007/s00405-013-2612-z> PMID: 23812554
30. Attias J, Horovitz G, El-Hatib N, & Nageris B. Detection and clinical diagnosis of noise-induced hearing loss by otoacoustic emissions. *Noise Health* [Internet]. 2001; 3(12):19–31. Available from: <https://www.noiseandhealth.org/text.asp?2001/3/12/19/31799> PMID: 12678938
31. Probst R, Harris FP, & Hauser R. Clinical monitoring using otoacoustic emissions. *Br J Audiol* [Internet]. 1993; 27(2):85–90. Available from: <https://doi.org/10.3109/03005369309077896> PMID: 8220286
32. Di Nardo W, Ghirlanda G, Paludetti G, Cercone S, Saponara C, Del Ninno M, et al. Distortion-product otoacoustic emissions and selective sensorineural loss in IDDM. *Diabetes Care* [Internet]. 1998; 21(8):1317–1321. Available from: <https://doi.org/10.2337/diacare.21.8.1317> PMID: 9702440
33. Lucertini M, Moleti A, & Sisto R. On the detection of early cochlear damage by otoacoustic emission analysis. *J Acoust Soc Am* [Internet]. 2002; 111(2):972–978. Available from: <https://doi.org/10.1121/1.1432979> PMID: 11863199
34. Boyle JA, Pinsard B, Boukhdhir A, Belleville S, Brambatti S, Chen J, et al. The Courtois project on neuronal modelling—2020 data release [Poster presentation]. Annual Meeting of the Organization for Human Brain Mapping [Internet]. 2020 June 23–July 3. Available from: [https://docs.cneuromod.ca/en/latest/\\_downloads/40f570bd627d600a2b26d7e6c56d331c/1939\\_BoylePinsard\\_OHBM2020.pdf](https://docs.cneuromod.ca/en/latest/_downloads/40f570bd627d600a2b26d7e6c56d331c/1939_BoylePinsard_OHBM2020.pdf)
35. Hughson W, & Westlake HD. Manual for program outline for rehabilitation of aural casualties both military and civilian. *Trans Am Acad Ophthalmol Otolaryngol*. 1944; 48(Suppl.):1–15.
36. Carhart R, & Jerger J. Preferred method for clinical determination of pure-tone thresholds. *J Speech Hear Disord* [Internet]. 1959; 24:330–345. Available from: <https://doi.org/10.1044/jshd.2404.330>
37. Acoustical Society of America. Specification for audiometers (ANSI Standard No. ANSI/ASA S3.6–2010). The American Standards Institute, Inc.; 2010
38. Schmuziger N, Probst R, & Smurzynski J. Test-retest reliability of pure-tone thresholds from 0.5 to 16 kHz using Sennheiser HDA 200 and Etymotic Research ER-2 earphones. *Ear Hear* [Internet]. 2004; 25(2):127–132. Available from: <https://doi.org/10.1097/01.aud.0000120361.87401.c8> PMID: 15064657
39. Fausti SA, Henry JA, Schaffer HI, Olson DJ, Frey RH, & McDonald WJ. High-frequency audiometric monitoring for early detection of aminoglycoside ototoxicity. *J Infect Dis* [Internet]. 1992; 165(6):1026–1032. Available from: <https://doi.org/10.1093/infdis/165.6.1026> PMID: 1583319
40. American Speech-Language-Hearing Association. Audiologic management of individuals receiving cochleotoxic drug therapy. The Association; 1994. Available from: <https://doi.org/10.1044/policy.GL1994-00003>
41. Daniell WE, Stover BD, & Takaro TK. Comparison of Criteria for Significant Threshold Shift in Workplace Hearing Conservation Programs. *J Occup Environ Med* [Internet]. 2003; 45(3):295–304. Available from: <https://doi.org/10.1097/01.jom.0000052962.43131.0d> PMID: 12661187
42. Dobie RA. Reliability and validity of industrial audiometry: implications for hearing conservation program design. *Laryngoscope* [Internet]. 1983; 93(7):906–927. Available from: <https://doi.org/10.1288/00005537-198307000-00014> PMID: 6865627

43. Dobie RA. Audiometric threshold shift definitions: simulations and suggestions. *Ear Hear* [Internet]. 2005; 26(1):62–77. Available from: <https://doi.org/10.1097/00003446-200502000-00006> PMID: 15692305
44. Occupational noise exposure, 29 C.F.R. Sect. 1910.95 (2021). Available from: <https://www.govinfo.gov/app/details/CFR-2021-title29-vol5/CFR-2021-title29-vol5-sec1910-95>
45. Schlauch RS, & Carney E. A multinomial model for identifying significant pure-tone threshold shifts. *J Speech Lang Hear Res* [Internet]. 2007; 50(6):1391–1403. Available from: [https://doi.org/10.1044/1092-4388\(2007/097\)](https://doi.org/10.1044/1092-4388(2007/097)) PMID: 18055764
46. Schlauch RS, & Nelson P. Puretone evaluation. In: Katz J, Chasin M, English K, Hood, & Tillery KL, editors. *Handbook of clinical audiology*. 7th ed. Philadelphia: Wolters Kluwer Health; 2015. p. 29–47.
47. Atherley GR, & Dingwall-Fordyce I. The reliability of repeated auditory threshold determination. *Br J Ind Med* [Internet]. 1963; 20(3):231–235. Available from: <https://doi.org/10.1136/oem.20.3.231> PMID: 14046161
48. Landry JA, & Green WB. Pure-Tone Audiometric Threshold Test-Retest Variability in Young and Elderly Adults. *Can J Speech Lang Pathol Audiol* [Internet]. 1999; 23(2):74–80. Available from: [https://cjslpa.ca/files/1999\\_JSLPA\\_Vol\\_23/No\\_02\\_45-98/Landry\\_Green\\_JSLPA\\_1999.pdf](https://cjslpa.ca/files/1999_JSLPA_Vol_23/No_02_45-98/Landry_Green_JSLPA_1999.pdf)
49. Keppler H, Dhooge I, Maes L, D'haenens W, Bockstael A, Philips B, et al. Transient-evoked and distortion product otoacoustic emissions: A short-term test-retest reliability study. *Int J Audiol* [Internet]. 2010; 49(2):99–109. Available from: <https://doi.org/10.3109/14992020903300431> PMID: 20151884
50. Lonsbury-Martin BL, Cutler WM, & Martin GK. Evidence for the influence of aging on distortion-product otoacoustic emissions in humans. *J Acoust Soc Am* [Internet]. 1991; 89(4):1749–1759. Available from: <https://doi.org/10.1121/1.401009> PMID: 2045583
51. Xu J, Moeller S, Auerbach EJ, Strupp J, Smith SM, Feinberg DA, et al. Evaluation of slice accelerations using multiband echo planar imaging at 3 T. *Neuroimage* [Internet]. 2013; 83:991–1001. Available from: <https://doi.org/10.1016/j.neuroimage.2013.07.055> PMID: 23899722
52. Peelle JE. Methodological challenges and solutions in auditory functional magnetic resonance imaging. *Front Neurosci* [Internet]. 2014; 8:253. Available from: <https://doi.org/10.3389/fnins.2014.00253> PMID: 25191218
53. Norman-Haignere S, & McDermott JH. Distortion products in auditory fMRI research: Measurements and solutions. *Neuroimage* [Internet]. 2016; 129:401–413. Available from: <https://doi.org/10.1016/j.neuroimage.2016.01.050> PMID: 26827809
54. Govindaraju R, Omar R, Rajagopalan R, Norlisah R, & Kwan-Hoong N. Hearing loss after noise exposure. *Auris nasus larynx* [Internet]. 2011; 38(4):519–522. Available from: <https://doi.org/10.1016/j.anl.2010.12.006> PMID: 21236610
55. Yildirim U, Kemal O, Elmali M, & Basar F. Does 3 Tesla Magnetic Resonance Imaging Have Adverse Effect on Cochlear Functions?. *J Int Adv otol* [Internet]. 2021; 17(5):412–416. Available from: <https://doi.org/10.5152/iao.2021.21091> PMID: 34617891
56. Yuan H, Ma PW, Chen JW, Wang WL, Gao W, Lu PH, et al. Development of an audiological assessment and diagnostic model for high occupational noise exposure. *Eur Arch Otorhinolaryngol* [Internet]. 2022 Dec 16. Available from: Epub ahead of print. <https://doi.org/10.1007/s00405-022-07787-9> PMID: 36525077
57. Stenfelt S, & Reinfeldt S. A model of the occlusion effect with bone-conducted stimulation. *Int J Audiol* [Internet]. 2007; 46(10):595–608. Available from: <https://doi.org/10.1080/14992020701545880> PMID: 17922349
58. Noble WS. How does multiple testing correction work?. *Nat Biotechnol* [Internet]. 2009; 27(12):1135–1137. Available from: <https://doi.org/10.1038/nbt1209-1135> PMID: 20010596
59. Lim EY, Tang IP, Peyman M, Ramli N, Narayanan P, & Rajagopalan R. 3 Tesla magnetic resonance imaging noise in standard head and neck sequence does not cause temporary threshold shift in high frequency. *Eur Arch Otorhinolaryngol* [Internet]. 2015; 272(11):3109–3113. Available from: <https://doi.org/10.1007/s00405-014-3232-y> PMID: 25205300
60. Kurakata K. Re-estimated normal hearing threshold levels for pure tones using the calculation procedure of ISO 7029:2017. *Int J Audiol*. 2022 Jun 29:1–9. Available from: Epub ahead of print. <https://doi.org/10.1080/14992027.2022.2089741> PMID: 35767250
61. Mishra SK, Saxena U, & Rodrigo H. Extended High-frequency Hearing Impairment Despite a Normal Audiogram: Relation to Early Aging, Speech-in-noise Perception, Cochlear Function, and Routine Ear-telephone Use. *Ear Hear* [Internet]. 2022; 43(3):822–835. Available from: <https://doi.org/10.1097/AUD.0000000000001140> PMID: 34700326
62. Schuknecht HF, & Gacek MR. Cochlear pathology in presbycusis. *Ann Otol Rhinol Laryngol* [Internet]. 1993; 102(1 Pt 2):1–16. Available from: <https://doi.org/10.1177/00034894931020S101> PMID: 8420477

63. Hayes ME, Hammond S, Montgomery AP, & Stephenson L. Improving Hearing Protection Device Noise Attenuation Through Fit-Testing in an Occupational Health Clinic. *Workplace Health Saf* [Internet]. 2022; 70(4):196–204. Available from: <https://doi.org/10.1177/21650799211067927> PMID: [35353017](https://pubmed.ncbi.nlm.nih.gov/35353017/)
64. Murphy WJ. How to assess hearing protection effectiveness: What is new in ANSI/ASA S12.68. *Acoust Today* [Internet]. 2008; 4(2):40–42. Available from: <https://acousticstoday.org/how-to-assess-hearing-protection-effectiveness-what-is-new-in-ansi-asa-s12-68-william-j-murphy/>
65. Kozlowski E, Mlynski R, Morzynski L, & Swidzinski A. A Tester to Evaluate the Correct Placement of Earplugs. *Int J Environ Res Public Health* [Internet]. 2022; 19(14):8482. Available from: <https://doi.org/10.3390/ijerph19148482> PMID: [35886333](https://pubmed.ncbi.nlm.nih.gov/35886333/)
66. Asakura S, & Kamogashira T. Sudden bilateral hearing loss after vestibular-evoked myogenic potentials. *Clin Case Rep* [Internet]. 2021; 9(11):e05025. Available from: <https://doi.org/10.1002/ccr3.5025> PMID: [34849224](https://pubmed.ncbi.nlm.nih.gov/34849224/)
67. Mattingly JK, Portnuff CD, Hondorp BM, & Cass SP. (2015). Sudden Bilateral Hearing Loss After Cervical and Ocular Vestibular Evoked Myogenic Potentials. *Otol Neurotol* [Internet]. 2015; 36(6):961–964. Available from: <https://doi.org/10.1097/MAO.0000000000000764> PMID: [25853612](https://pubmed.ncbi.nlm.nih.gov/25853612/)
